# Supplementary material for: Status and Magnitude of Grey Wolf Conflict with Pastoral Communities in the Foothills of the Hindu Kush Region of Pakistan
Source: MDPI journal article supplement (doi:10.3390/ani9100787), 2019-10-11
Supplement: s1 [file s1]

## Supplementary

# HUMAN-GREY WOLF INTERACTION SURVEY

Enumerator Name: \_\_\_\_\_ Date: \_\_\_\_\_  
 Respondent Name: \_\_\_\_\_ Village Name: \_\_\_\_\_  
 Education: \_\_\_\_\_ Age: \_\_\_\_\_  
 Ethnic background: \_\_\_\_\_ Occupation: \_\_\_\_\_  
 How many earning members are there in the household? \_\_\_\_\_  
 Home much agricultural land your family own? \_\_\_\_\_ HH Size \_\_\_\_\_

### Predator Status:

Did you sight Grey wolf in your area in the past 1 year (Jan-Dec 2016)?

| Wolf                 | Response |    | Nubmer of observations | Status |      |        |
|----------------------|----------|----|------------------------|--------|------|--------|
|                      | Yes      | No |                        | Common | Rare | Absent |
| Sighting/observation |          |    |                        |        |      |        |

Population of wolf you wish to increase/maintain/reduce /eliminate from your area:

↑ / → / ↓ / x

| Increase | Maintain | Reduce | Eliminate | No response |
|----------|----------|--------|-----------|-------------|
| ↑        | →        | ↓      | x         | —           |

Which one is most dangerous for livestock, rate 4-4(from low to high):

| Not dangerous | Dangerous | Slightly dangerous | Very dangerous | Extremly dangerous |
|---------------|-----------|--------------------|----------------|--------------------|
| 0             | 1         | 2                  | 3              | 4                  |

### Livestock

How many livestock your family own?

| Livestock  | Goats | Sheep | Cattle | Other |
|------------|-------|-------|--------|-------|
| Number     |       |       |        |       |
| Vaccinated |       |       |        |       |

Other: Donkey, Horse etc.

Mortality due to Disease in 1 year (January – December 2016):

| Livestock | Goats | Sheep | Cattle | Yak | Other |
|-----------|-------|-------|--------|-----|-------|
| Number    |       |       |        |     |       |

Livestock sold in 1 year:

| Livestock          | Goats | Sheep | Cattle | Yak | Other |
|--------------------|-------|-------|--------|-----|-------|
| Number             |       |       |        |     |       |
| Total Income in Rs |       |       |        |     |       |

### Predation Losses

Predation in 1 year:

| Predator | Season/ month | Location | Prey type | Prey sex | Prey Age | Guarded (Y/N) | Circumstances |
|----------|---------------|----------|-----------|----------|----------|---------------|---------------|
|          |               |          |           |          |          |               |               |
|          |               |          |           |          |          |               |               |
|          |               |          |           |          |          |               |               |
|          |               |          |           |          |          |               |               |
|          |               |          |           |          |          |               |               |

Seasons: Winter (Dec-Feb), Spring (Mar-May), Summer (Jun-Aug), Autumn (Sep-Nov)

Supplementary

# HUMAN-GREY WOLF INTERACTION SURVEY

---

Any other Damage by wildlife: \_\_\_\_\_
